# Supplementary material
Source: PubMed Central journal article supplement (PMC3008435)
Supplement: supp_48_12_4464__1.pdf [file supp_48_12_4464__1.pdf]

| Table 1S: Relative % of Specific Species of Bacteria Adhering to SHA Squares <i>in vivo</i> Over Time |                   |                    |              |                    |                    |              |          |                    |              |
|-------------------------------------------------------------------------------------------------------|-------------------|--------------------|--------------|--------------------|--------------------|--------------|----------|--------------------|--------------|
| Time                                                                                                  | Rel % Actinomyces |                    |              | Rel % Streptococci |                    |              | Rel % Aa |                    |              |
|                                                                                                       | No Aa             | Aa on BEC & pocket | Aa in pocket | No Aa              | Aa on BEC & pocket | Aa in pocket | No Aa    | Aa on BEC & pocket | Aa in pocket |
| 5 min                                                                                                 | 6.48±3.65         | 18.69±26.29        | 5.72±8.10    | 58.89±23.96        | 88.62±64.03        | 71.06±25.45  | 0        | 0                  | 0            |
| 1 hr                                                                                                  | 9.17±14.32        | 12.13±7.17         | 11.23±0.73   | 45.67±45.23        | 85.22±73.46        | 94.46±4.61   | 0        | 0                  | 0            |
| 2 hr                                                                                                  | 1.60±0.70         | 10.15±5.60         | 4.47±0.15    | 74.29±13.05        | 87.13±22.25        | 67.19±9.81   | 0        | 0                  | 0            |
| 4 hr                                                                                                  | 1.24±1.26         | 18.86±22.74        | 7.18±12.17   | 65.02±13.01        | 95.25±36.41        | 75.11±6.11   | 0        | 0                  | 0            |
| 6 hr                                                                                                  | 2.46±1.92         | 7.83±7.36          | 2.84±3.07    | 51.86±18.12        | 78.99±10.69        | 40.43±50.10  | 0        | 0.0012±0.0009      | 0            |
| 7 hr                                                                                                  | 1.40±0.11         | 6.78±4.10          | 2.84±2.53    | 36.54±25.02        | 86.47±15.83        | 40.44±25.03  | 0        | 0.0044±0.0002      | 0            |
